# Supplementary material
Source: PubMed Central journal article supplement (PMC5109955)

### **Supplemental data**

**Table e-1.** Characteristics of sample analyzed with IL-6 assayed at all time points over the 10-year period (N=179) to sample excluded for absence of 1 to 3 IL-6 assays (N=101).

**Table e-2.** Association of gait-speed and, NAWM-FA and WMH on brain MRI (dependent variables) with sustained exposure to IL-6 over prior 10 years (independent variable) in the sample older adults with at least 3 IL-6 assays over the 10-year study (n=280).

**Figure e-1:** Flow chart depicting participant sample size and reasons for exclusions.

**Table e-1.** Characteristics of sample analyzed with IL-6 assayed at all time points over the 10-year period (N=179) to sample excluded for absence of 1 to 3 IL-6 assays (N=101).

|                                                        | <b>Participants<br/>included<br/>N=179</b> | <b>Participants<br/>excluded<br/>N=101</b> | <b>p<br/>value</b> |
|--------------------------------------------------------|--------------------------------------------|--------------------------------------------|--------------------|
| Age, mean(SD)                                          | 83.1 (2.7)                                 | 82.8 (2.9)                                 | 0.4                |
| Female, n (%)                                          | 104 (58.1)                                 | 60 (59.4)                                  | 0.9                |
| Black, n (%)                                           | 66 (36.9)                                  | 48 (47.5)                                  | 0.1                |
| Postsecondary school education, n (%)                  | 95 (52.5)                                  | 48 (47.5)                                  | 0.5                |
| IL-6* at time of brain MRI, (pg/ml)                    | 3.1 (2.2)                                  | 4.1 (2.6)                                  | 0.003              |
| Average 10-year IL-6* exposure, (pg/ml)                | 2.7 (1.6)                                  | 3.6 (3.1)                                  | 0.004              |
| Rate of change in IL-6, (pg/ml/year)                   | 0.08 (0.2)                                 | 0.05 (0.1)                                 | 0.01               |
| Gait Speed, (m/sec)                                    | 0.92 (0.2)                                 | 0.88 (0.2)                                 | 0.2                |
| Modified Mini-mental Status Examination score          | 93.5 (5.9)                                 | 91.6 (8.2)                                 | 0.04               |
| Diabetes Mellitus-II, n (%)                            | 40 (22.4)                                  | 33 (32.7)                                  | 0.07               |
| Smokers, n (%)                                         | 4 (2.3)                                    | 1 (1)                                      | 0.7                |
| Moderate intensity exercise in the last 12 months , n% | 41 (23)                                    | 26 (26)                                    | 0.7                |
| Hypertension, n (%)                                    | 121 (67.6)                                 | 71 (37)                                    | 0.6                |
| Stroke, n (%)                                          | 16 (8.9)                                   | 9 (9)                                      | 1.0                |
| Coronary heart disease, n (%)                          | 41 (22.9)                                  | 26 (26)                                    | 0.7                |
| Non-steroidal anti-inflammatory drugs, n (%)           | 15 (8.4)                                   | 9 (9.2)                                    | 0.8                |
| APOE4 <sup>†</sup> positive status, n (%)              | 42 (23.5)                                  | 25 (28.7)                                  | 0.4                |
| Body mass index (kg/m <sup>2</sup> )                   | 27.1 (4.3)                                 | 28.1 (4.6)                                 | 0.06               |
| Grip strength (cm <sup>2</sup> )                       | 30.5 (10.3)                                | 30.3 (8.7)                                 | 0.8                |
| UPDRS <sup>‡</sup> - motor score                       | 2.1 (3.7)                                  | 2.2 (4.3)                                  | 0.7                |
| WMH normalized to total brain volume, mean (SD)        | 0.0036 (0.004)                             | 0.0036 (0.004)                             | 0.95               |

|               |               |               |      |
|---------------|---------------|---------------|------|
| FA, mean (SD) | 0.360 (0.014) | 0.356 (0.013) | 0.02 |
|---------------|---------------|---------------|------|

---

Footnotes:

\*: IL-6: interleukin-6

†: APOE4: apo-epsilon, allele 4

‡: UPDRS: Unified Parkinson's Disease Rating Scale

**Table e-2.** Association of gait-speed and, NAWM-FA and WMH on brain MRI (dependent variables) with sustained exposure to IL-6 over prior 10 years (independent variable) in the sample older adults with at least 3 IL-6 assays over the 10-year study (n=280).

|                                                                                                                                  | Dependent Variables (Beta and p values) |                |               |
|----------------------------------------------------------------------------------------------------------------------------------|-----------------------------------------|----------------|---------------|
|                                                                                                                                  | <b>Gait speed</b>                       | <b>NAWM-FA</b> | <b>WMH</b>    |
| Unadjusted                                                                                                                       | -0.26 (0.001)                           | -0.125 (0.039) | 0.24 (0.001)  |
| Model A: Age, sex, race, education                                                                                               | -0.23 (0.001)                           | -0.120 (0.043) | 0.22 (0.002)  |
| Model B: Fully adjusted model **                                                                                                 | -0.144 (0.037)                          | -0.082 (ns)    | 0.231 (0.002) |
| Model C: Model B + WMH or NAWM FA (NAWM-FA/WMH as dependent variable) or both WMH and NAWM-FA (gait speed as dependent variable) | -0.095 (0.17)                           | -0.020 (ns)    | 0.189 (0.005) |

\*\* Models adjusted for age, sex, race, obese, self-reported moderate exercise intensity prior 12 months, coronary heart disease, diabetes mellitus Type II, hypertension, modified mini-mental score, Unified Parkinson's disease rating scale motor subscale score, total intracranial volume.

**Figure e-1:** Flow chart depicting participant sample size and reasons for exclusions.

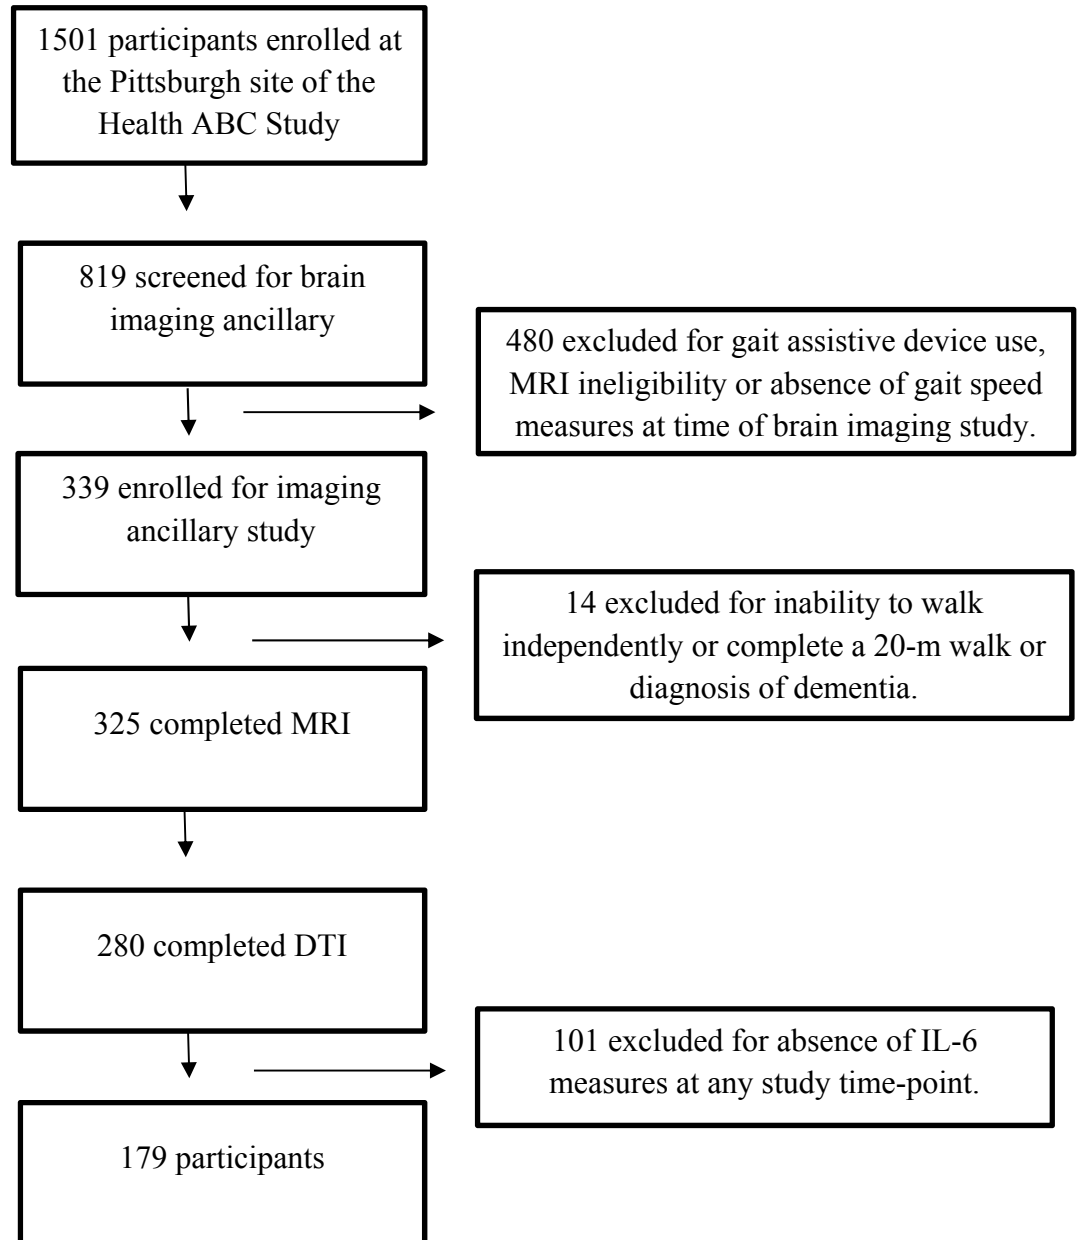

Supplement: supp_WNL.0000000000003304_Supplemental_data.pdf [file supp_WNL.0000000000003304_Supplemental_data.pdf]
